# Supplementary material
Source: publisher site journal article supplement (https://www.dovepress.com/article/489802)
Supplement: Supplementary file 1 [file get_supplementary_file.php]

*Supplementary Figure 1. Survey sample disposition*

Starting Sample

N=64,012

Not Usable

n=19,012 (30%)

*Existing opt-outs or insubstantial*

*contact information*

Sample Used

n=45,000 (70%)

No-Response

n=42,896 (95%)

*Inconclusive disposition*

Responded to recruitment materials

n=2,104 (5%)

Refused

n=94 (4%)

Consented

n=2,010 (96%)

Excluded

n=1,300 (65%)

*Quota filled=956*

*Failed screening=331*

*Indeterminate sMRA=13*

**Summary Survey Metrics**

*Survey Completion Method, n (%)*

- Internet: 573 (96%)
- Telephone: 27 (4%)

*Rates, %*

- Response Rate (RR)1: 5%
- Exclusion Rate (ER)2: 65%
- Cooperation Rate (COOP)3: 52%
- List Completion Rate (LCR)4: 1%

1RR = Responded/Sample used

2ER = Excluded/Sample used

3COOP = Completed surveys/ (Responded – Excluded)

4LCR = Completed surveys/Sample used

Qualified

n=710 (35%)

Partially Completed (started but did

not finish)

n=110 (15%)

Completed Survey

n=600 (85%)

*Current sMRA user=454*

*Past sMRA user=146*

*Supplementary Table 1.* *Comparison of survey responders and non-responders and survey completers and non-completers using claims data*

|  | **Survey  responders** | **Survey non-responders** | **Standard mean difference (SMD)** | **Survey  completers** | **Survey non-completers** | **SMD** |
| --- | --- | --- | --- | --- | --- | --- |
| **Number of patients, N** | 2,104 | 42,896 |  | 600 | 1,504 |  |
| **Age in years** |  |  |  |  |  |  |
| Mean (SD) | 54.2 (17.11) | 55.1 (18.58) | 0.047 | 53.6 (15.69) | 54.5 (17.65) | 0.052 |
| Median (IQR) | 57 (40-67) | 58 (40-69) |  | 56 (41-65) | 58 (40-68) |  |
| **Sex, n (%)** |  |  |  |  |  |  |
| Male | 572 (27.2%) | 12,225 (28.5%) | 0.029 | 140 (23.3%) | 432 (28.7%) | 0.123 |
| Female | 1,532 (72.8%) | 30,671 (71.5%) |  | 460 (76.7%) | 1,072 (71.3%) |  |
| **Health plan type, n (%)** |  |  |  |  |  |  |
| HMO | 1,162 (55.2%) | 21,540 (50.2%) | 0.114 | 334 (55.7%) | 828 (55.1%) | 0.076 |
| PPO | 686 (32.6%) | 16,265 (37.9%) |  | 197 (32.8%) | 489 (32.5%) |  |
| CDHP | 251 (11.9%) | 4,971 (11.6%) |  | 66 (11.0%) | 185 (12.3%) |  |
| Unknown/other | 5 (0.2%) | 120 (0.3%) |  | 3 (0.5%) | 2 (0.1%) |  |
| **Health plan product, n (%)** |  |  |  |  |  |  |
| Commercial | 1,077 (51.2%) | 24,186 (56.4%) | 0.104 | 321 (53.5%) | 756 (50.3%) | 0.065 |
| Medicare Advantage | 1,027 (48.8%) | 18,710 (43.6%) |  | 279 (46.5%) | 748 (49.7%) |  |
| **Geographic region,n (%)** |  |  |  |  |  |  |
| Midwest | 239 (11.4%) | 5,706 (13.3%) | 0.247 | 46 (7.7%) | 193 (12.8%) | 0.211 |
| Northeast | 1,060 (50.4%) | 17,089 (39.8%) |  | 307 (51.2%) | 753 (50.1%) |  |
| South | 570 (27.1%) | 12,465 (29.1%) |  | 186 (31.0%) | 384 (25.5%) |  |
| West | 230 (10.9%) | 7,545 (17.6%) |  | 58 (9.7%) | 172 (11.4%) |  |
| Unknown | 5 (0.2%) | 91 (0.2%) |  | 3 (0.5%) | 2 (0.1%) |  |
| **QCI score, continuous** |  |  |  |  |  |  |
| Mean (SD) | 1.5 (1.91) | 1.6 (2.05) | 0.040 | 1.5 (1.86) | 1.5 (1.93) | 0.014 |
| Median (IQR) | 1 (0-3) | 1 (0-3) |  | 1 (0-3) | 1 (0-3) |  |

Abbreviations: CDHP (consumer-directed health plan), HMO (health maintenance organization), IQR (interquartile range), PPO (preferred provider organization), SD (standard deviation),SMD (standard mean difference)
